# Supplementary material for: Enhancing the mechanical and tribological properties of epoxy composites via incorporation of reactive bio-based epoxy functionalized graphene oxide
Source: Royal Society of Chemistry journal article supplement (doi:10.1039/d0ra07751h), 2020-01-01
Supplement: d0ra07751h1.pdf [file d0ra07751h1.pdf]

# Enhancing the mechanical and tribological properties of epoxy composites via incorporation of reactive bio-based epoxy functionalized graphene oxide

Hao Wu <sup>a, b, c</sup>, Chengbao Liu <sup>a</sup>, Li Cheng <sup>a</sup>, Yue Yu <sup>a, b</sup>, Haichao Zhao <sup>a\*</sup>, Liping Wang <sup>a\*</sup>

<sup>a</sup> Key Laboratory of Marine Materials and Related Technologies, Zhejiang Key Laboratory of Marine Materials and Protective Technologies, Ningbo Institute of Materials Technology and Engineering, Chinese Academy of Sciences, Ningbo 315201, China.

<sup>b</sup> Nano Science and Technology Institute, University of Science and Technology of China, Suzhou, 215123, China.

<sup>c</sup> Innovation Academy of South China Sea Ecology and Environmental Engineering,

---

Chinese Academy of Sciences, Guangzhou 510301, China

\*Corresponding authors:

E-mail: [zhaohaichao@nimte.ac.cn](mailto:zhaohaichao@nimte.ac.cn) (H. Zhao) and [wangliping@nimte.ac.cn](mailto:wangliping@nimte.ac.cn) (L. Wang)

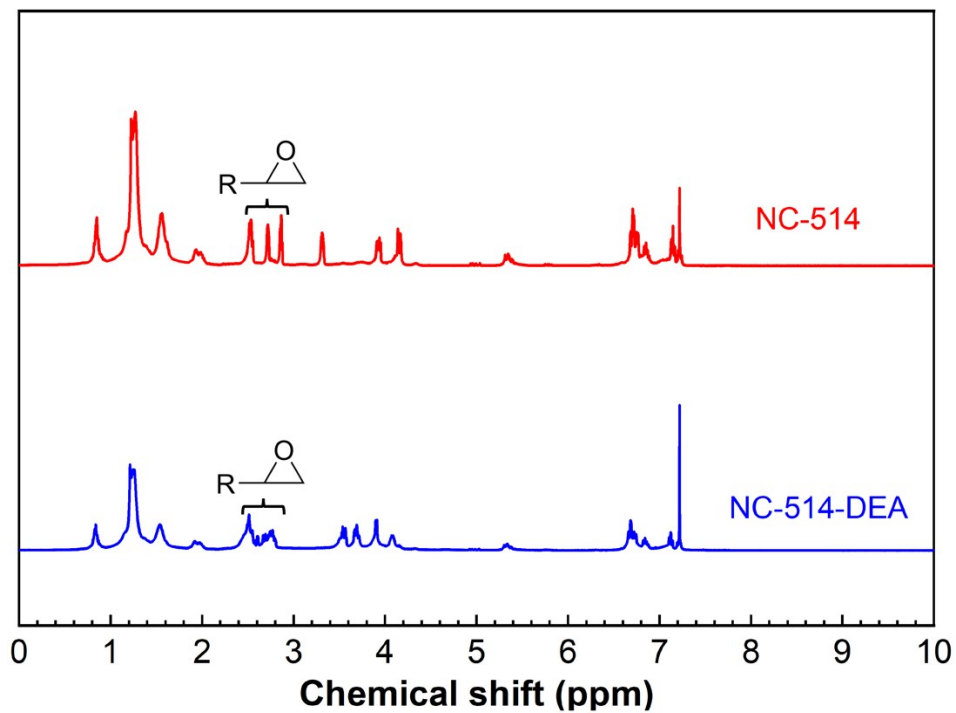

**Fig. S1.**  $^1\text{H-NMR}$  spectra of NC-514 and NC-514-DEA.

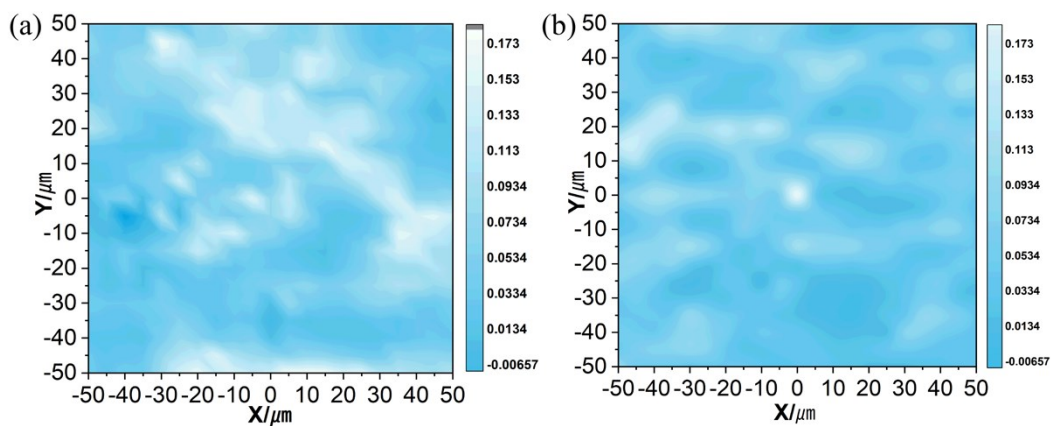

**Fig. S2.** Epoxy/IGO value of Roman spectrum of (b) EP/GO0.5% and (d) EP/GOND0.5%.

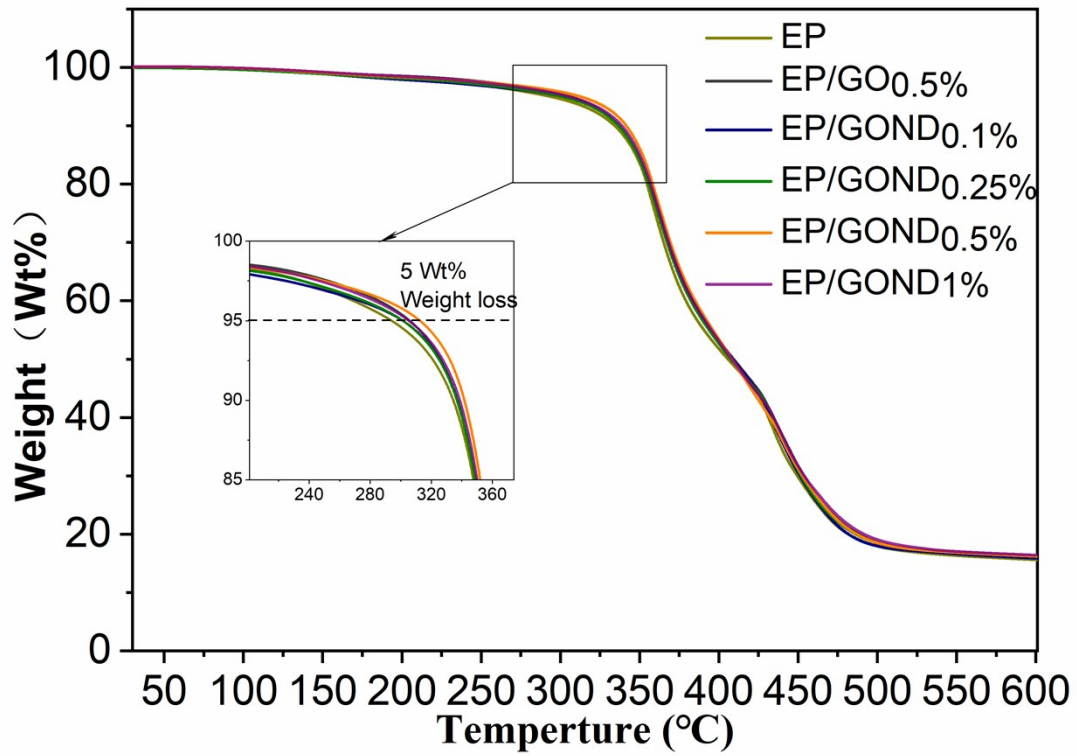

**Fig. S3.** TGA curves of EP and its nanocomposites.

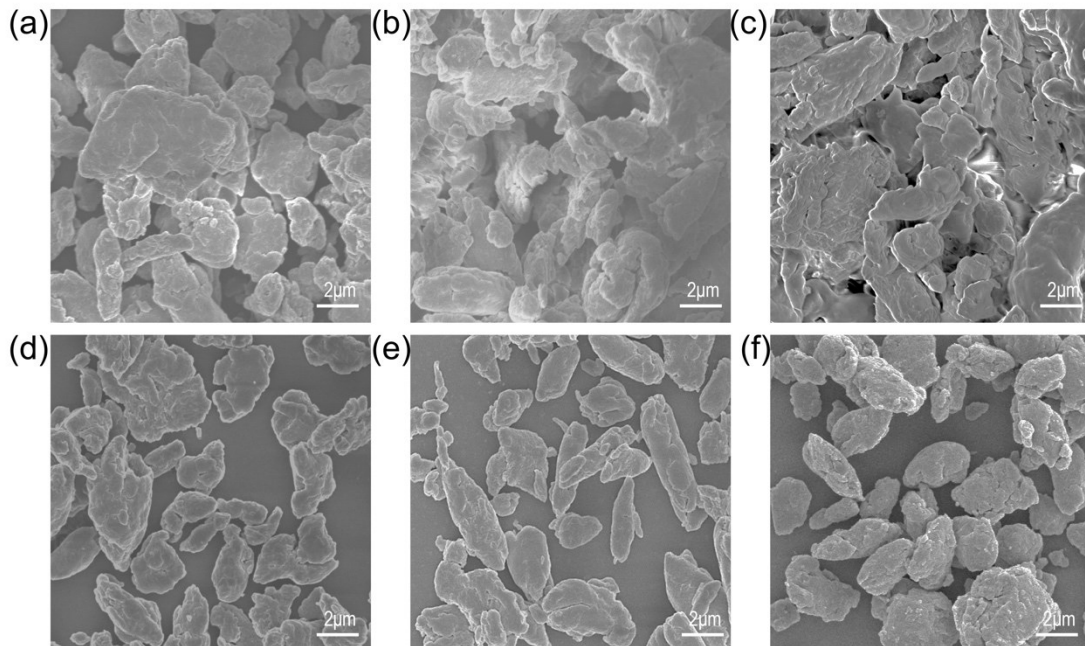

**Fig. S4.** SEM of wear debris on composite coatings at frequency 3Hz under 2N load at ambient environment with (a) EP, (b) EP/GO<sub>0.5%</sub>, (c) EP/GOND<sub>0.1%</sub>, (d) EP/GOND<sub>0.25%</sub>, (e) EP/GOND<sub>0.5%</sub> and (f) EP/GOND<sub>1%</sub>.

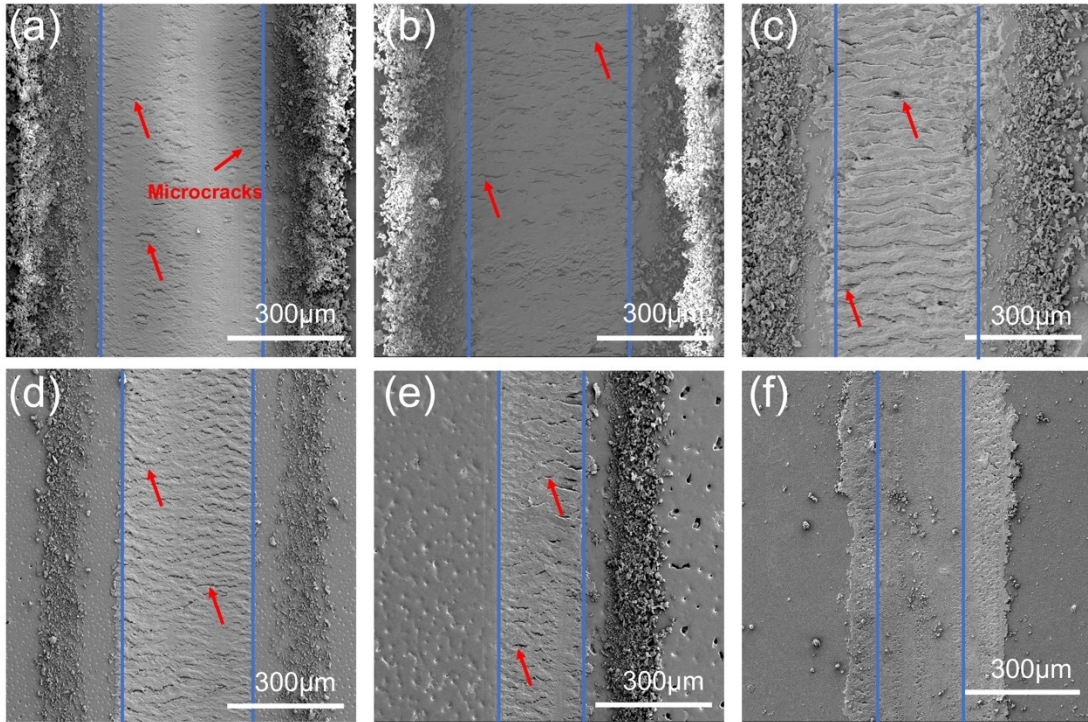

**Fig. S5.** SEM of wear scar on composite coatings at frequency 3Hz under 2N load at ambient environment with (a) EP, (b) EP/GO<sub>0.5%</sub>, (c) EP/GOND<sub>0.1%</sub>, (d) EP/GOND<sub>0.25%</sub>, (e) EP/GOND<sub>0.5%</sub> and (f) EP/GOND<sub>1%</sub>.
